# Supplementary material for: In situ architecture of the ER-mitochondria encounter structure
Source: PubMed Central journal article supplement (PMC7614606; doi:10.1038/s41586-023-06050-3), 2023-05-10
Supplement: EMS173552-supplement-Extended_Data.pdf [file EMS173552-supplement-Extended_Data.pdf]

**a**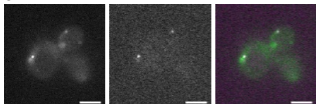

Mdm34-EGFP

Mdm12-mCherry

Mdm34-EGFP  
Mdm12-mCherry**b**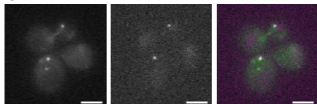

Mdm34-EGFP

Mmm1-mCherry

Mdm34-EGFP  
Mmm1-mCherry**c**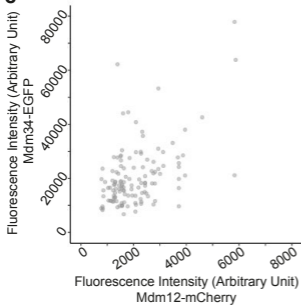**d**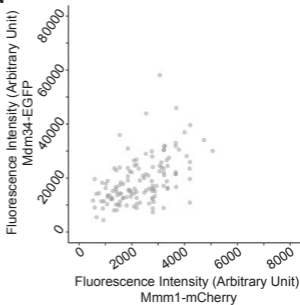

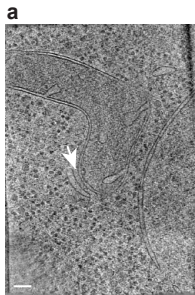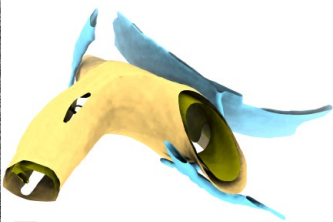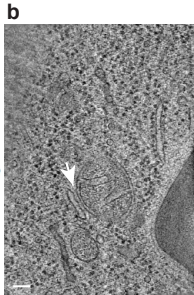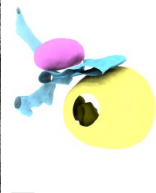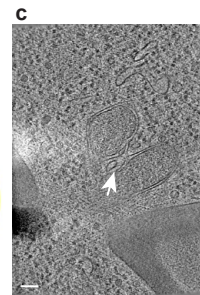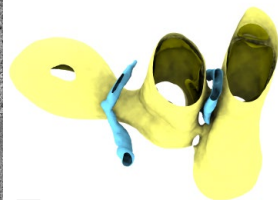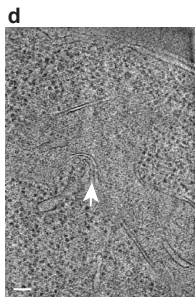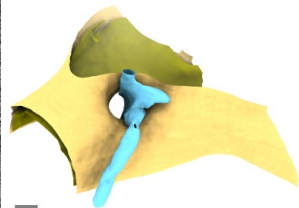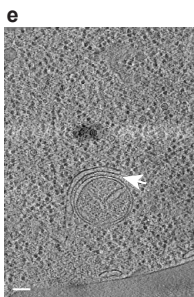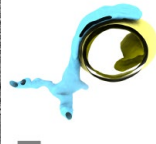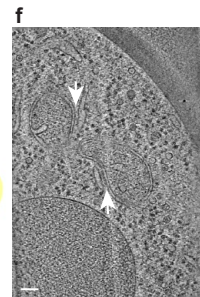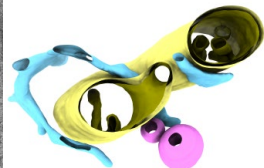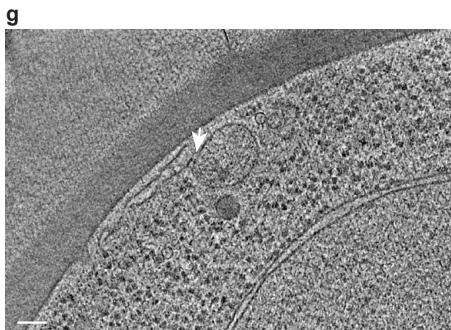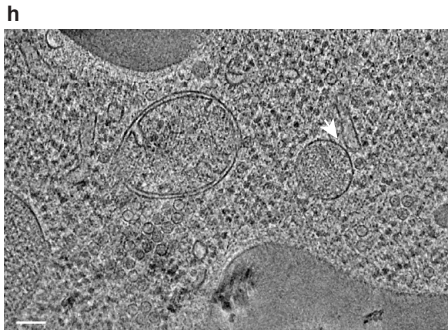

**a Picking ERMES**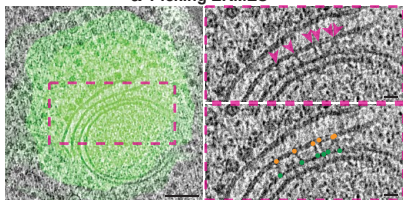

ER and OMM proximal positions of bridging structures found in tomograms at locations of Mdm34-mNeonGreen cryo-FM signals were manually clicked as two points using Dynamo and stored as dipole models. The centres of these dipoles were used as extraction points for STA using subTOM

**e Spin( $\Phi$ )-free Alignment**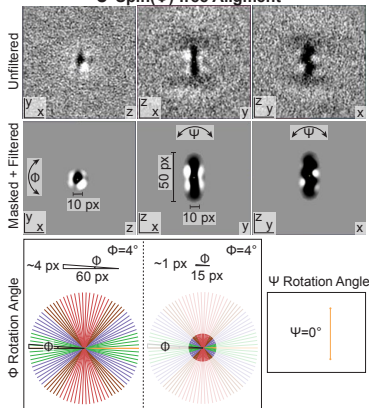**f Fine Alignment**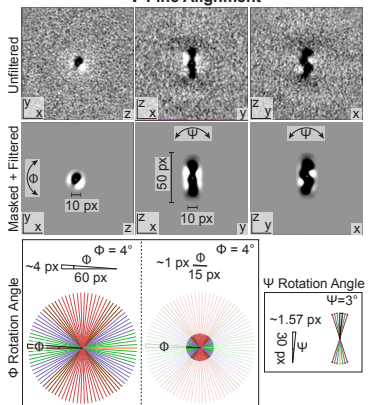**b Randomization of Spin Rotation**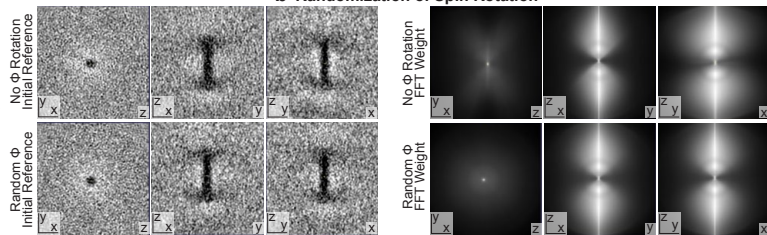

Randomization of spin rotation around z-axis to minimize missing wedge dominant alignments

**d Secondary Alignment**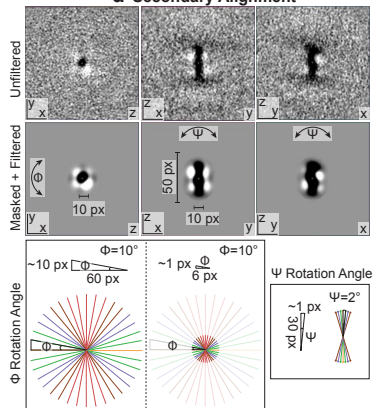**c Coarse Alignment**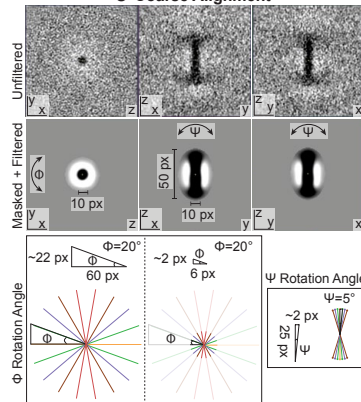**g Alignment Including OMM**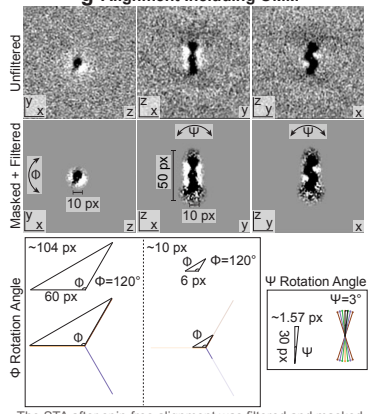**h Final STA**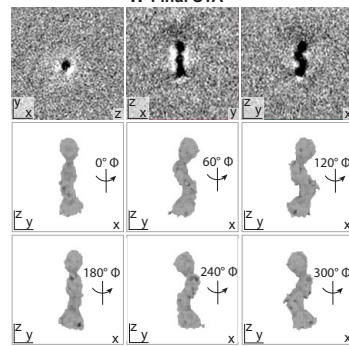

The STA after spin-free alignment was filtered and masked to produce a template for 3 iterations of a fine angular search alignment

The STA after spin-free alignment was filtered and masked to partially include the OMM as a template for 3 iterations of a coarse angular search alignment

**a**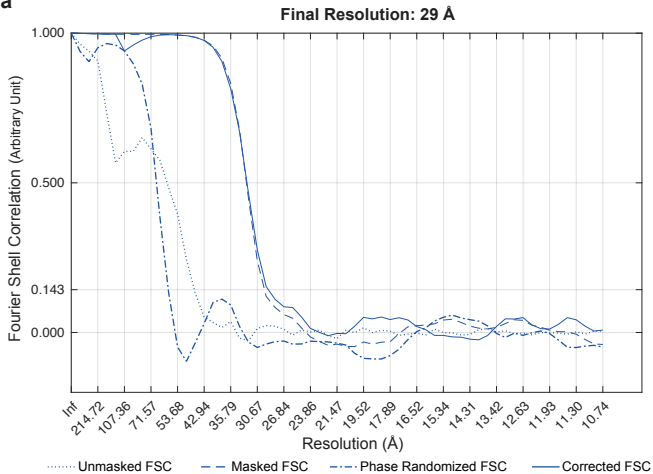**b**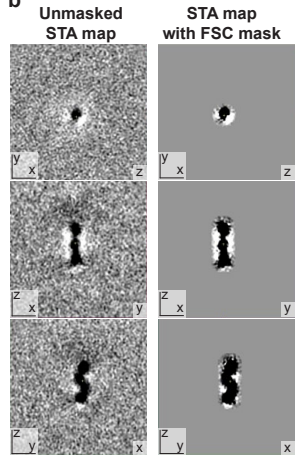



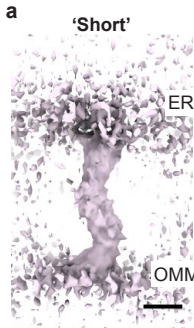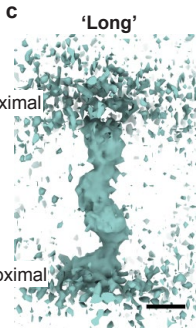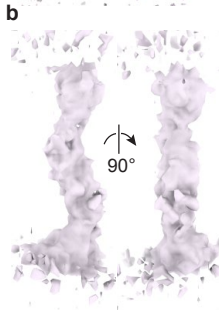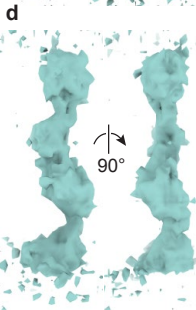

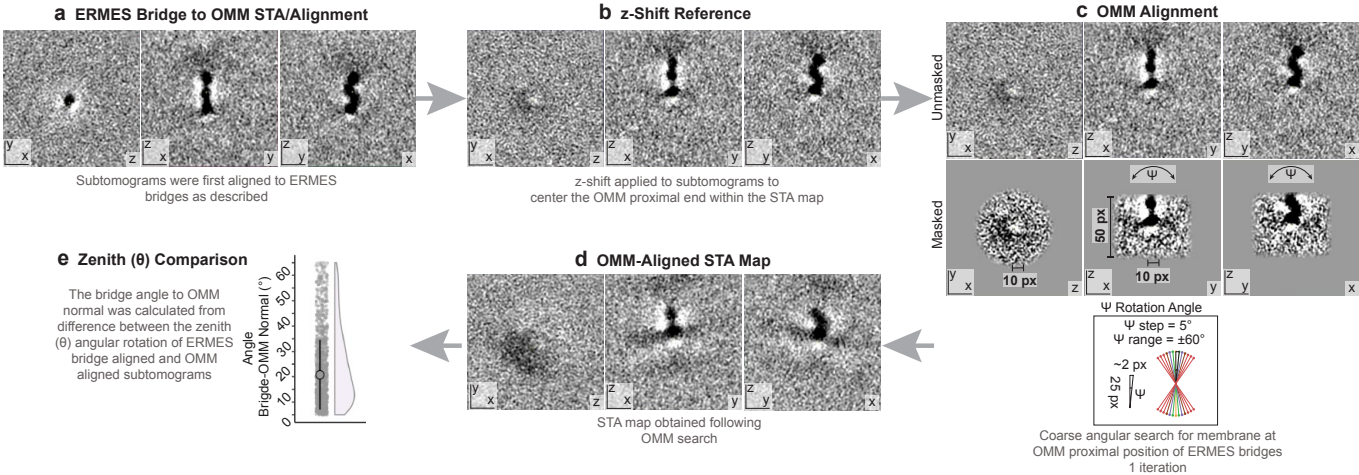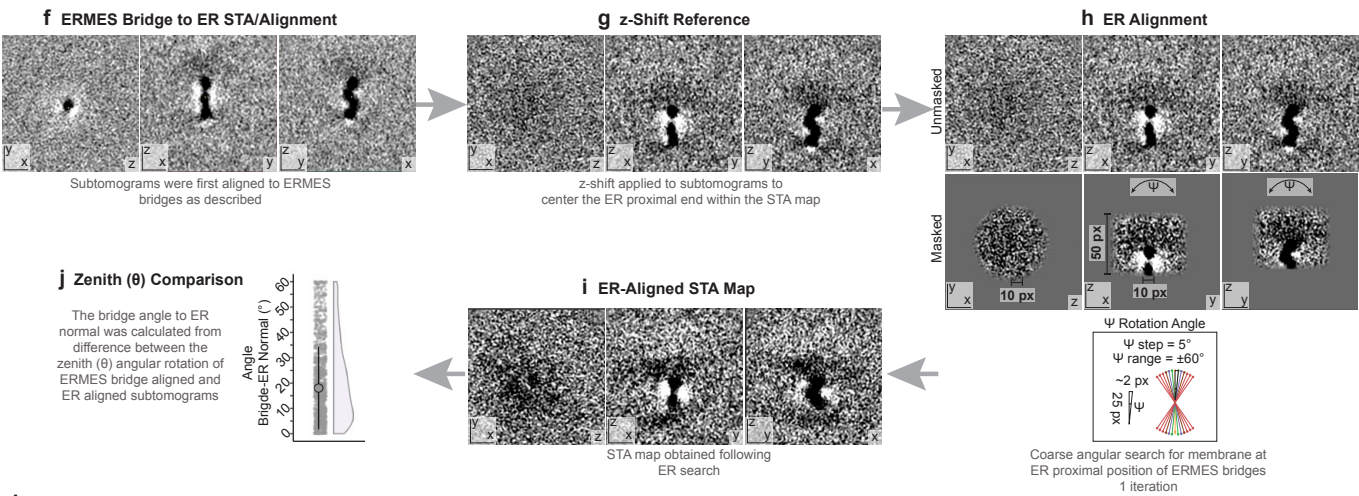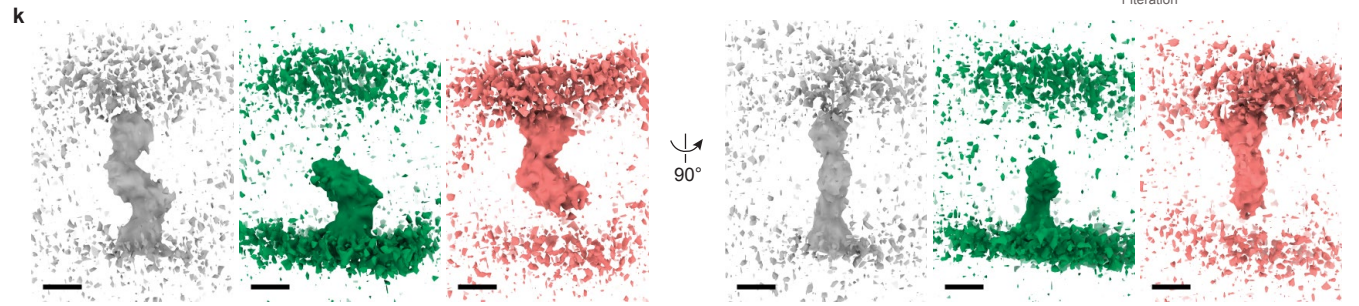

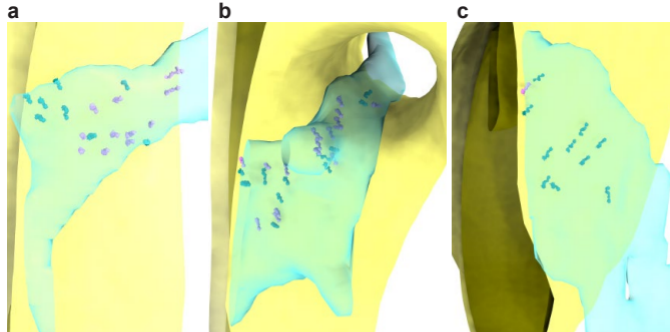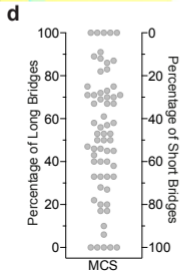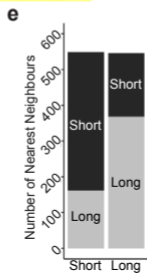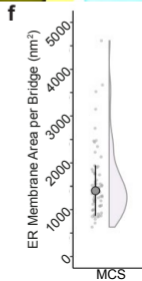

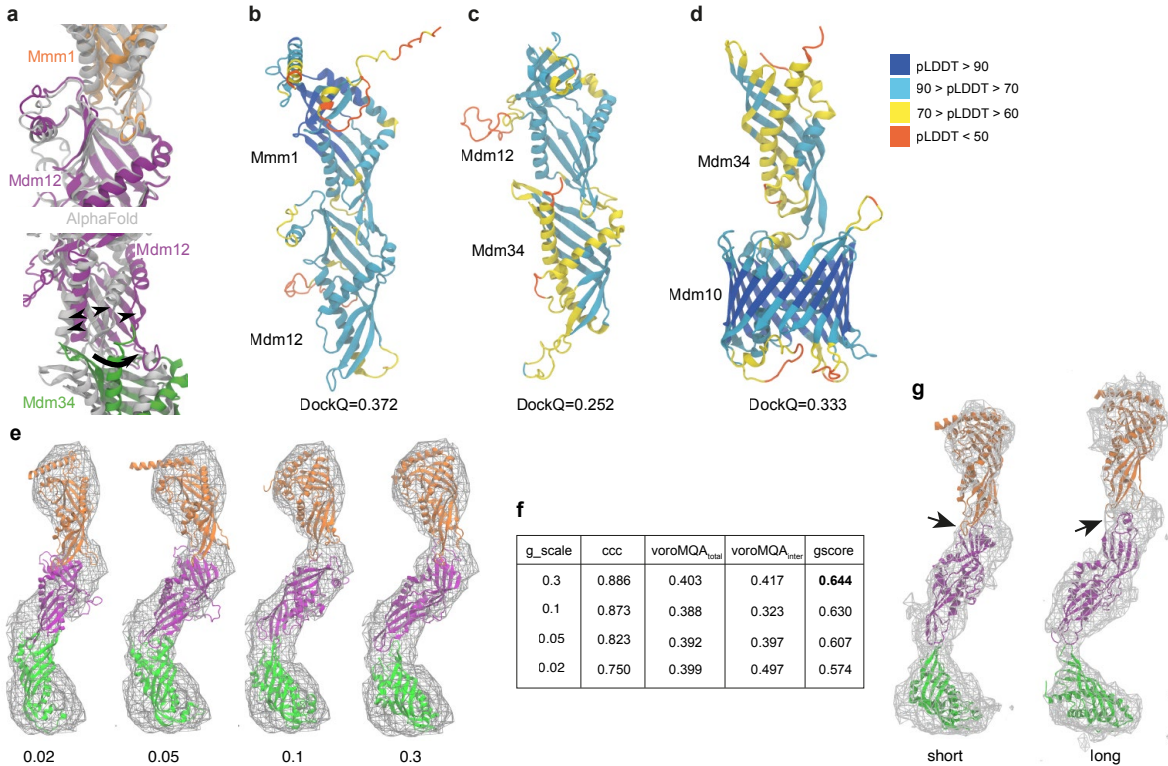



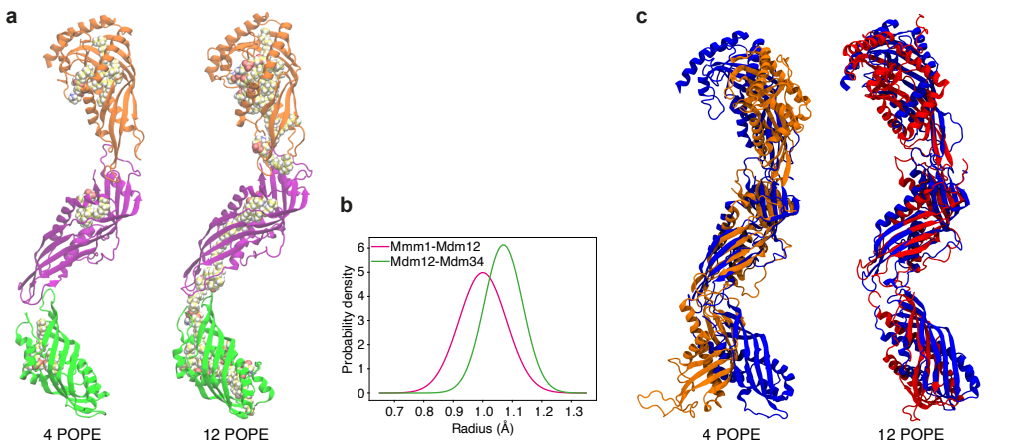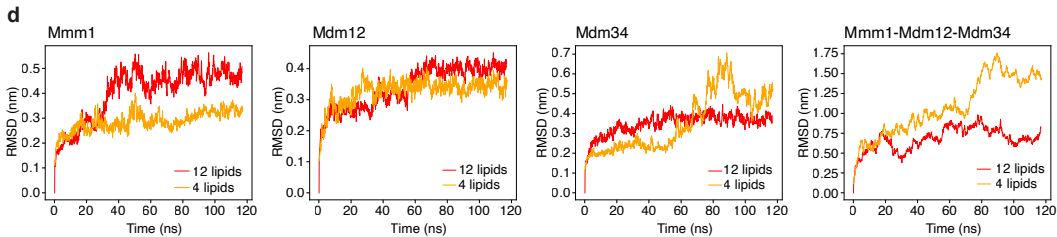

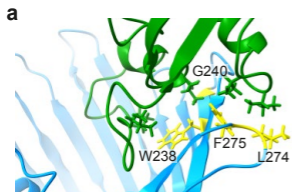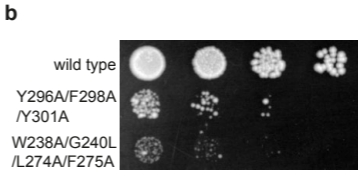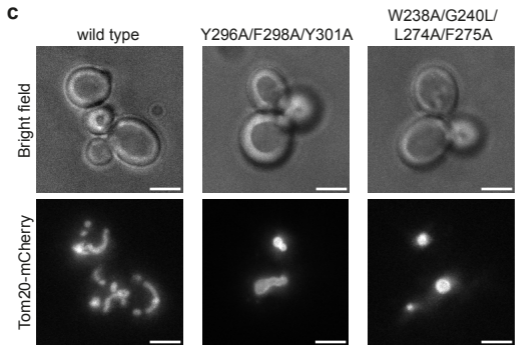

---

## ERMES bridges

EMD-16873

---

### Cryo-ET data collection and processing

|                                                             |                                       |
|-------------------------------------------------------------|---------------------------------------|
| Microscope                                                  | Titan Krios                           |
| Magnification                                               | 33000 x                               |
| Voltage (kV)                                                | 300                                   |
| Detector                                                    | Gatan K3 in<br>superresolution mode   |
| Energy filter                                               | yes                                   |
| Electron exposure per tilt series<br>( $e^-/\text{\AA}^2$ ) | approx. 140 - 150                     |
| Defocus range ( $\mu\text{m}$ )                             | -3.5 to -6.0                          |
| Pixel size ( $\text{\AA}$ )                                 | 1.342                                 |
| Tilt range (min, max, increment)                            | $-56^\circ$ , $+56^\circ$ , $1^\circ$ |
| Tilt scheme                                                 | Dose-symmetric                        |
| Frame number                                                | 4                                     |
| Tomograms used for STA (no.)                                | 51                                    |
| Initial subtomograms (no.)                                  | 1133                                  |
| Final subtomograms (no.)                                    | 1098                                  |
| Map resolution ( $\text{\AA}$ )<br>at FSC threshold 0.143   | 29                                    |
| Map resolution range ( $\text{\AA}$ )                       | -                                     |
